# Supplementary material for: Synthesis and Application of Dendritic Fibrous Nanosilica/Gold Hybrid Nanomaterials
Source: PubMed Central journal article supplement — ChemistryOpen. 2018 May 16;7(5):349–55. doi: 10.1002/open.201800040 (PMC5974554; doi:10.1002/open.201800040), 2018-05-16
Supplement: OPEN-7-349-s001.pdf [file OPEN-7-349-s001.pdf]

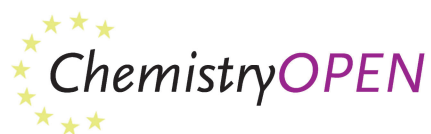

## Supporting Information

© 2018 The Authors. Published by Wiley-VCH Verlag GmbH & Co. KGaA, Weinheim

### **Synthesis and Application of Dendritic Fibrous Nanosilica/ Gold Hybrid Nanomaterials**

Wongyun Byoun, Soeun Jung, Ngoc Minh Tran, and Hyojong Yoo<sup>\*[a]</sup>

open\_201800040\_sm\_miscellaneous\_information.pdf

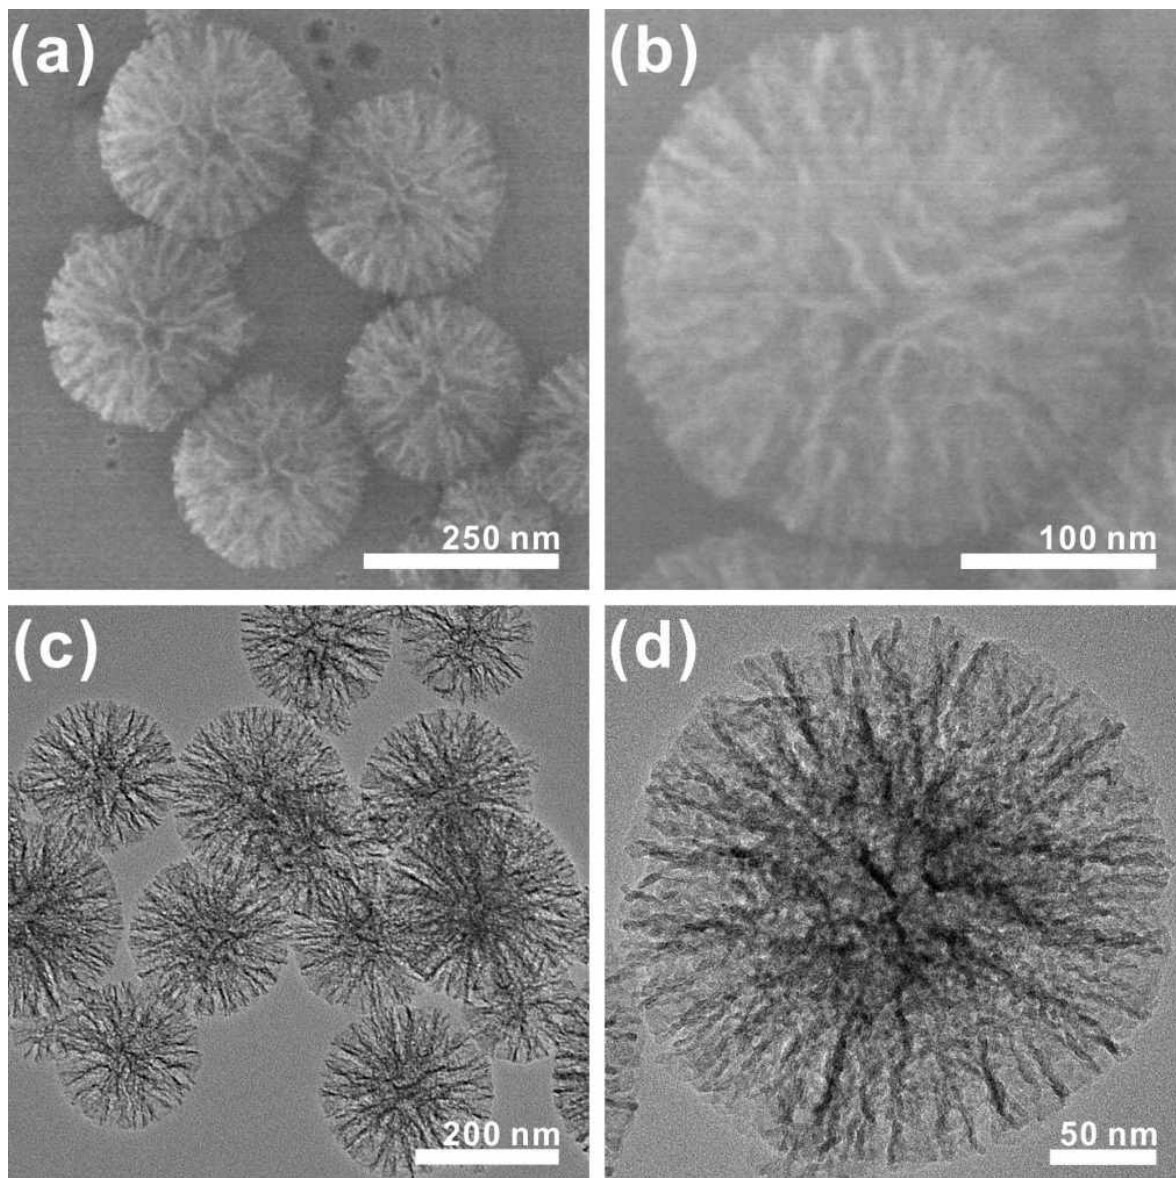

**Figure S1.** (a, b) SEM and (c, d) TEM images of DFNS.

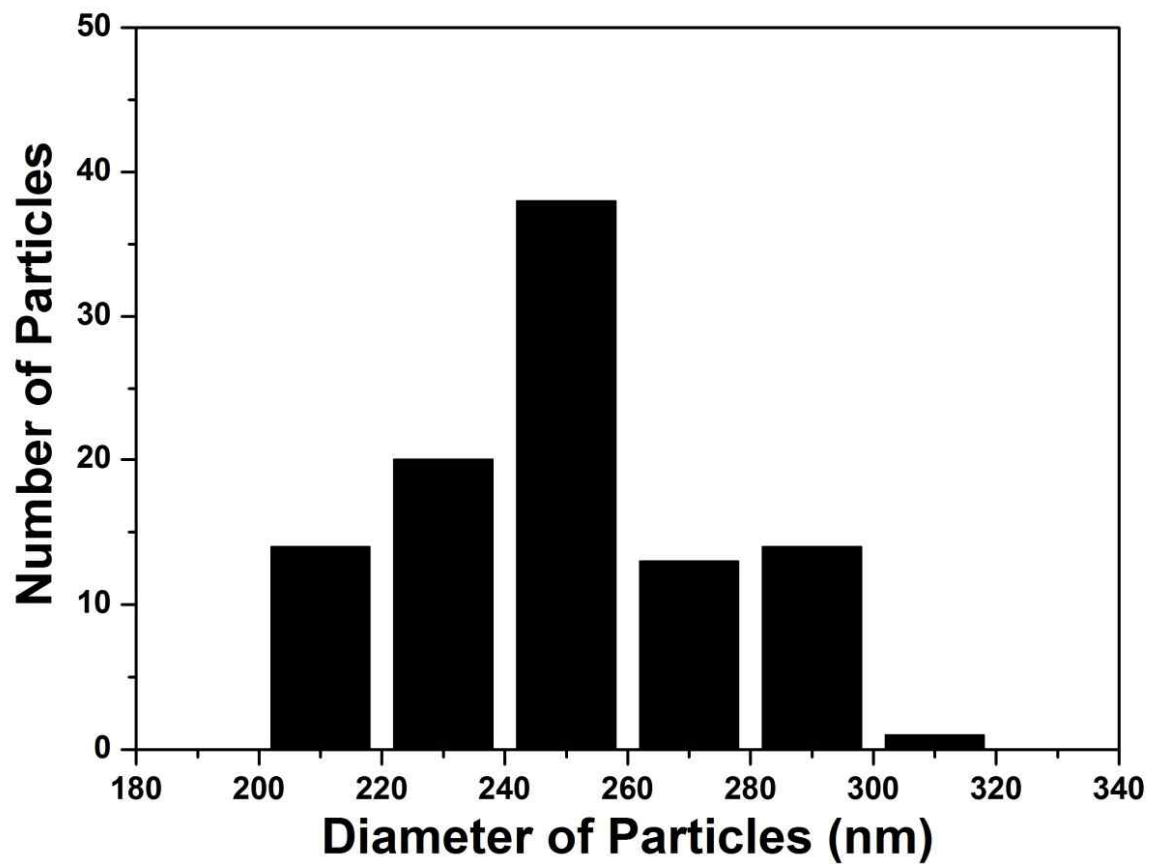

**Figure S2.** Size distribution of the DFNS. The average diameter is  $250.59 \pm 24.78$  nm (More than 100 nanoparticles are evaluated).

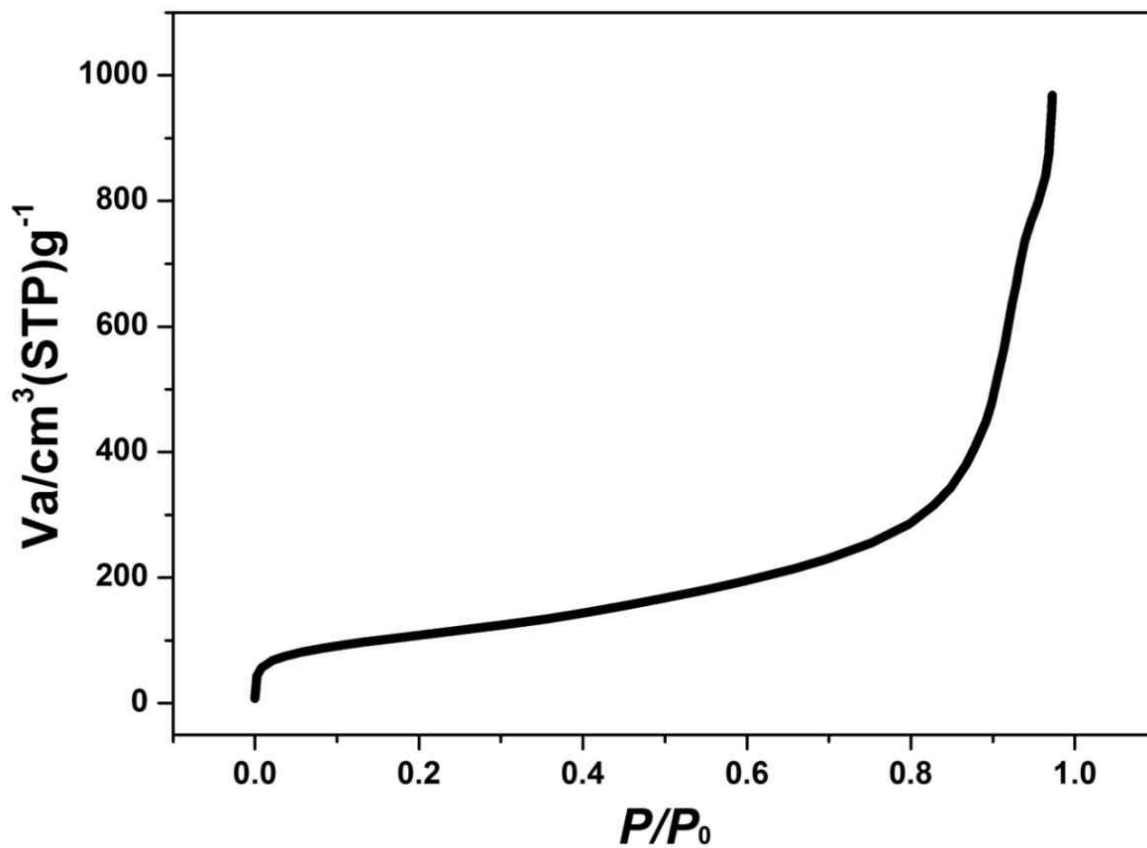

**Figure S3.** Nitrogen adsorption measured at 77 K of the DFNS. The specific surface area, pore volume, and pore size are  $378.48 \text{ m}^2 \text{ g}^{-1}$ ,  $1.49 \text{ cm}^3 \text{ g}^{-1}$ , and  $15.46 \text{ nm}$ , respectively.

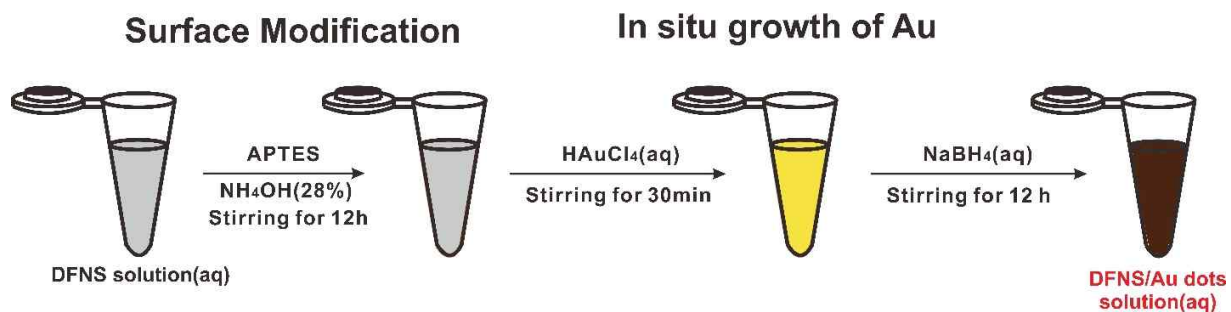

**Figure S4.** Schematic illustration of synthetic protocol of DFNS/Au dots by surface modification and an *in situ* growth method.

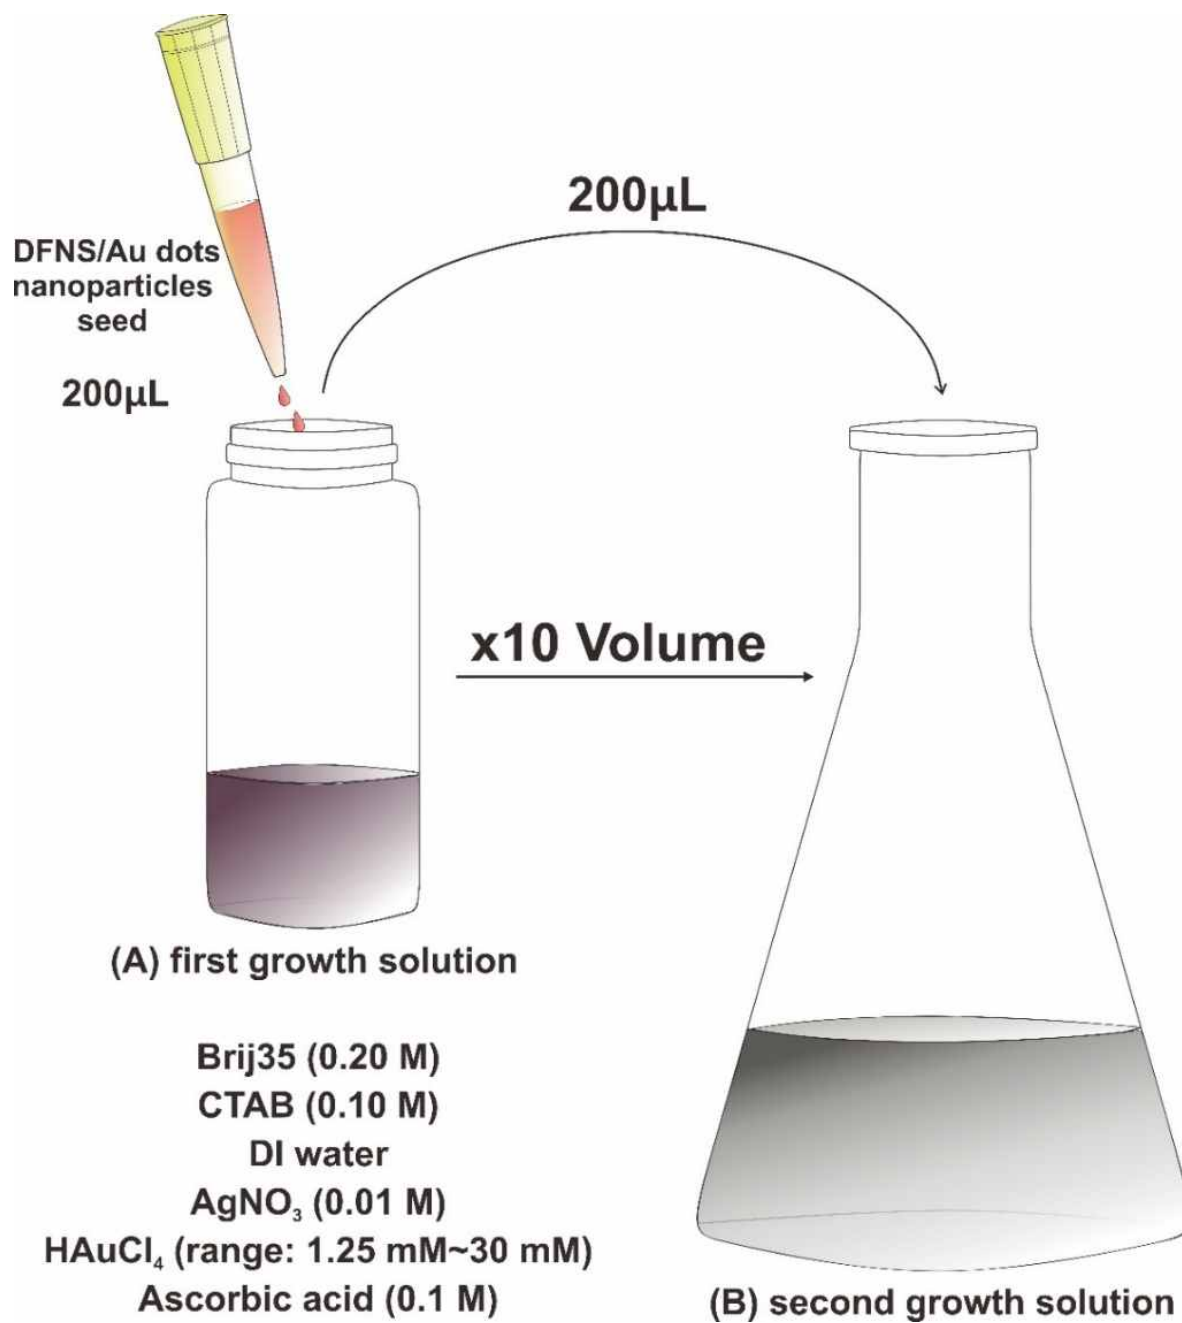

**Figure S5.** Schematic illustration of the synthesis of the DFNS/Au hybrids by a seed-mediated growth method.

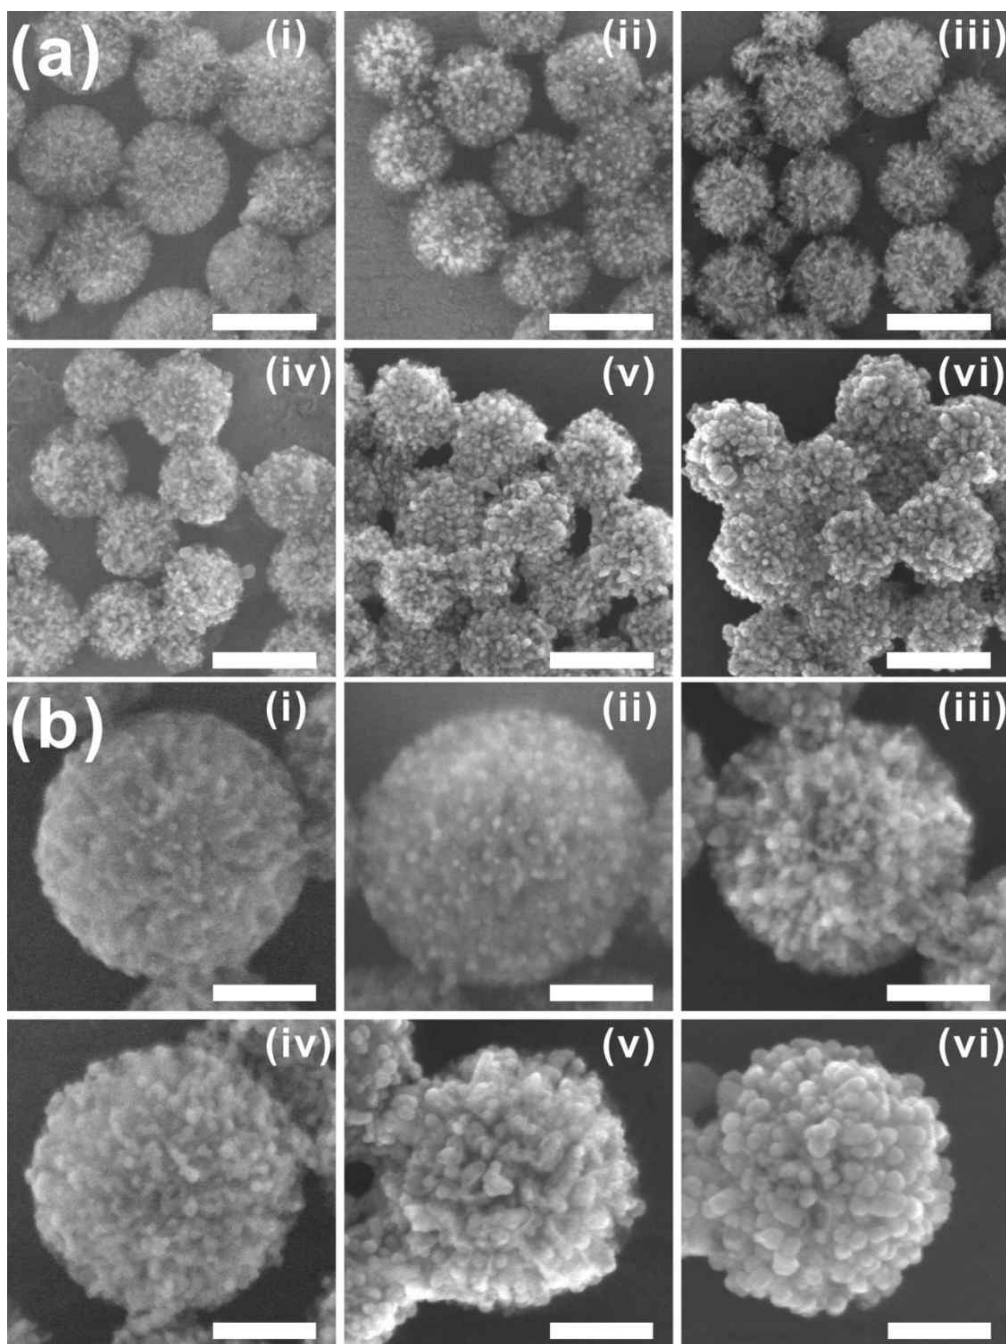

**Figure S6.** SEM images of DFNS/Au hybrids synthesized using various  $\text{HAuCl}_4$  (aq) concentrations ((a) a couple of particles, scale bar: 250 nm, (b) a single particle, scale bar: 100 nm): (i) 1.25 mM, (ii) 2.5 mM, (iii) 5 mM, (iv) 10 mM, (v) 20 mM, and (vi) 30 mM  $\text{HAuCl}_4$  (aq) (the same volume of the second growth solution, 0.8 mL is used in all cases). Based on the synthesis ratio (molar ratio = amount of  $\text{HAuCl}_4$  in the growth solution/amount of  $\text{HAuCl}_4$  in the DFNS/Au dots), the reaction ratio can be assigned as (i) 7, (ii) 15, (iii) 30, (iv) 61, (v) 123, and (vi) 246.

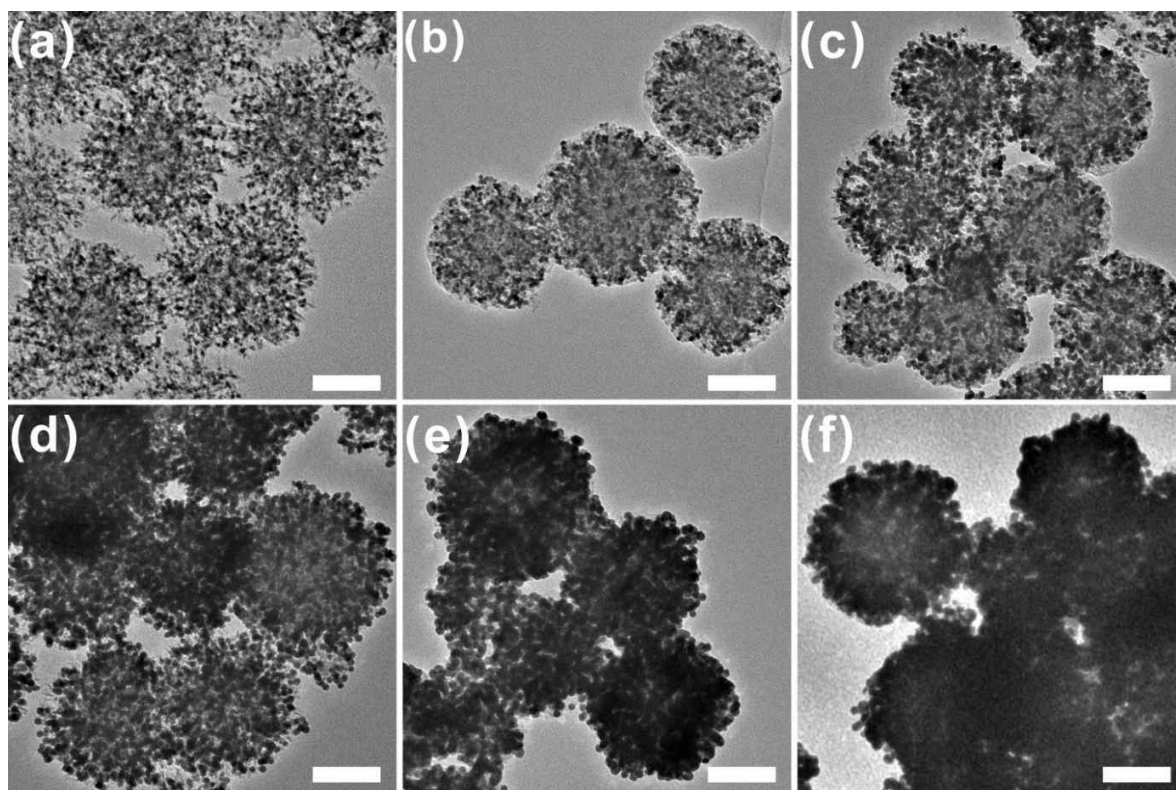

**Figure S7.** TEM images of DFNS/Au hybrids synthesized using various  $\text{HAuCl}_4(\text{aq})$  concentrations: (a) 1.25 mM, (b) 2.5 mM, (c) 5 mM, (d) 10 mM, (e) 20 mM and (f) 30 mM  $\text{HAuCl}_4(\text{aq})$  (the same volume of the second growth solution, 0.8 mL, was used in each case). Based on the synthesis ratio (molar ratio = amount of  $\text{HAuCl}_4$  in growth solution/amount of  $\text{HAuCl}_4$  in the DFNS/Au dots), the reaction ratio can be assigned as (a) 7, (b) 15, (c) 30, (d) 61, (e) 123, and (f) 246. Scale bar: 250 nm.



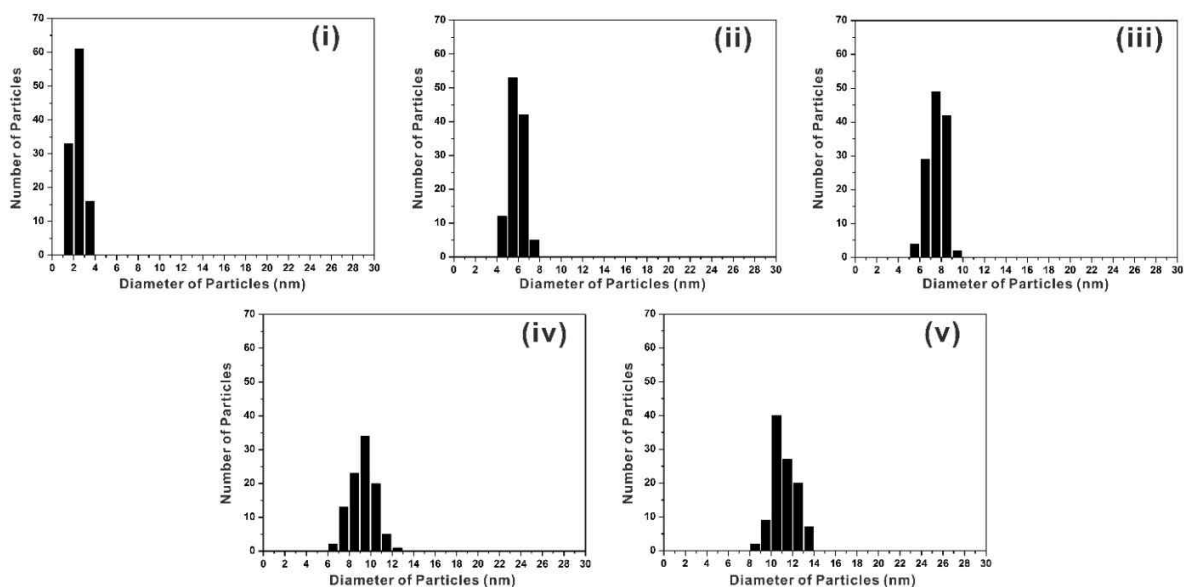

**Figure S8.** Size distributions of the Au nanodots or nanoparticles in various DFNS/Au NPs. The average diameters are  $2.34 \pm 0.64$  nm ((i) DFNS/Au dots);  $5.93 \pm 0.76$  nm ((ii) ratio: 7);  $7.49 \pm 0.82$  nm ((iii) ratio: 15);  $9.25 \pm 1.12$  nm ((iv) ratio: 30);  $11.17 \pm 1.14$  nm ((v) ratio: 61). More than 100 nanodots or nanoparticles are analyzed in each evaluation.

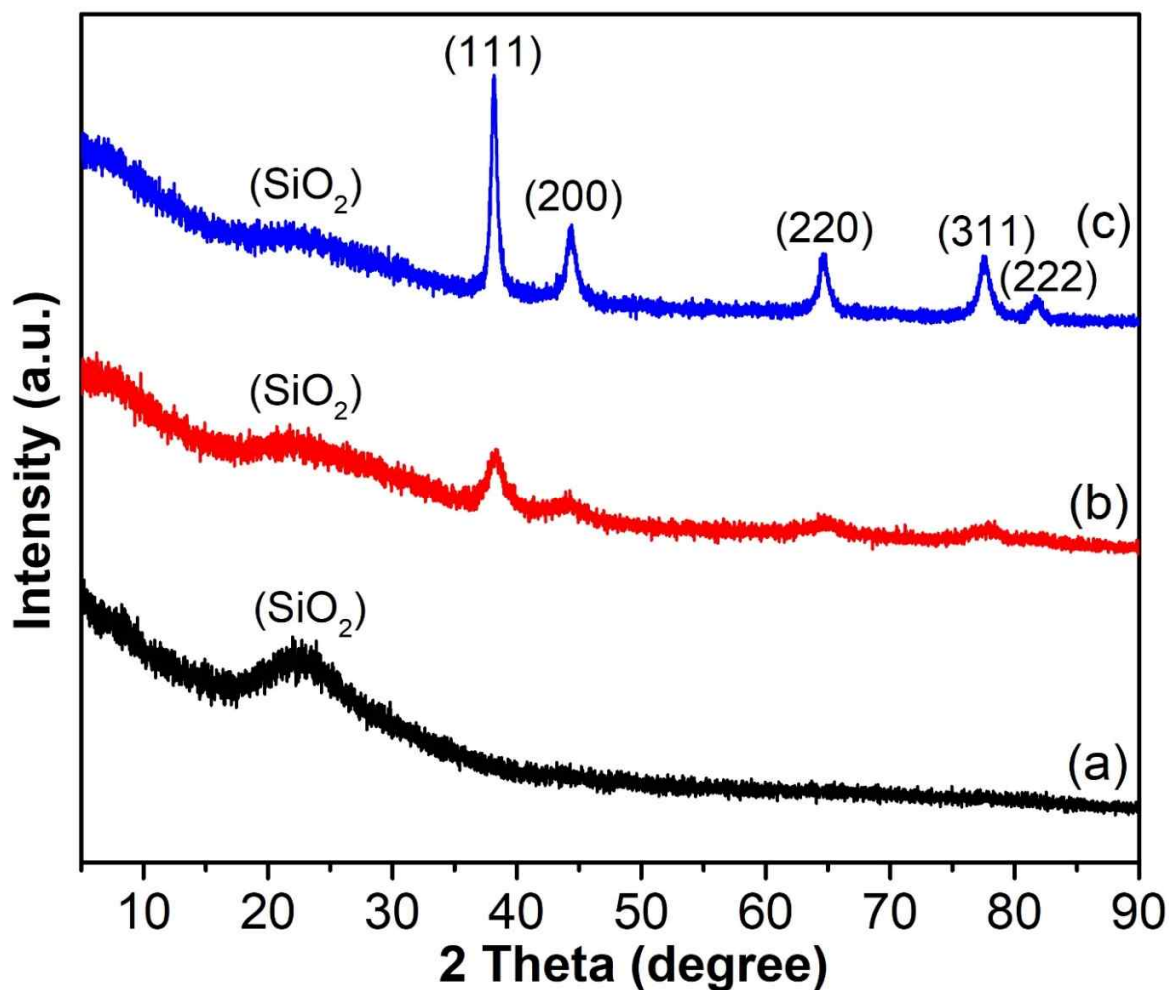

**Figure S9.** Powder X-ray diffraction (PXRD) patterns of (a) DFNS (black line) and DFNS/Au hybrids synthesized using (b) 5 mM (red line) and (c) 30 mM HAuCl<sub>4</sub> (aq) (blue line) (the same volume of the second growth solution, 0.8 mL, is used in all cases). Based on the synthesis ratio (molar ratio = amount of HAuCl<sub>4</sub> in the growth solution / amount of HAuCl<sub>4</sub> in the DFNS/Au dots), the reaction ratios can be assigned as (b) 30 and (c) 246. Diffraction peaks of  $2\theta = 38.2, 44.4, 64.8, 77.7,$  and  $81.7$  can be assigned to the (111), (200) (220), (311), and (222) reflections.

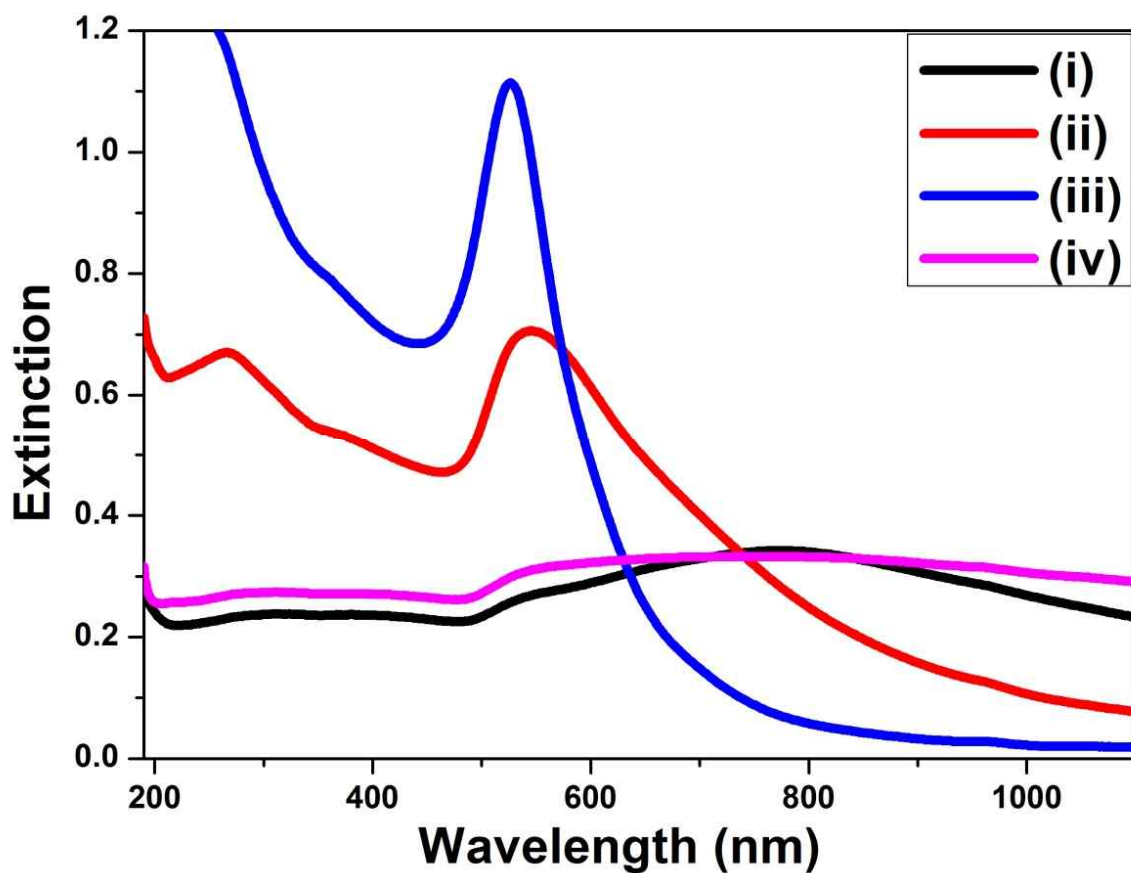

**Figure S10.** UV-vis spectra of aqueous solutions of DFNS/Au nanosystems synthesized using varying reaction conditions: (i) DFNS/Au layers (ratio: 246, original condition), (ii) without  $\text{AgNO}_3$  (aq), (iii) without Brij 35, and (iv) without CTAB (The  $\text{HAuCl}_4$  concentration is 30 mM in each case, other experimental conditions remain the same).

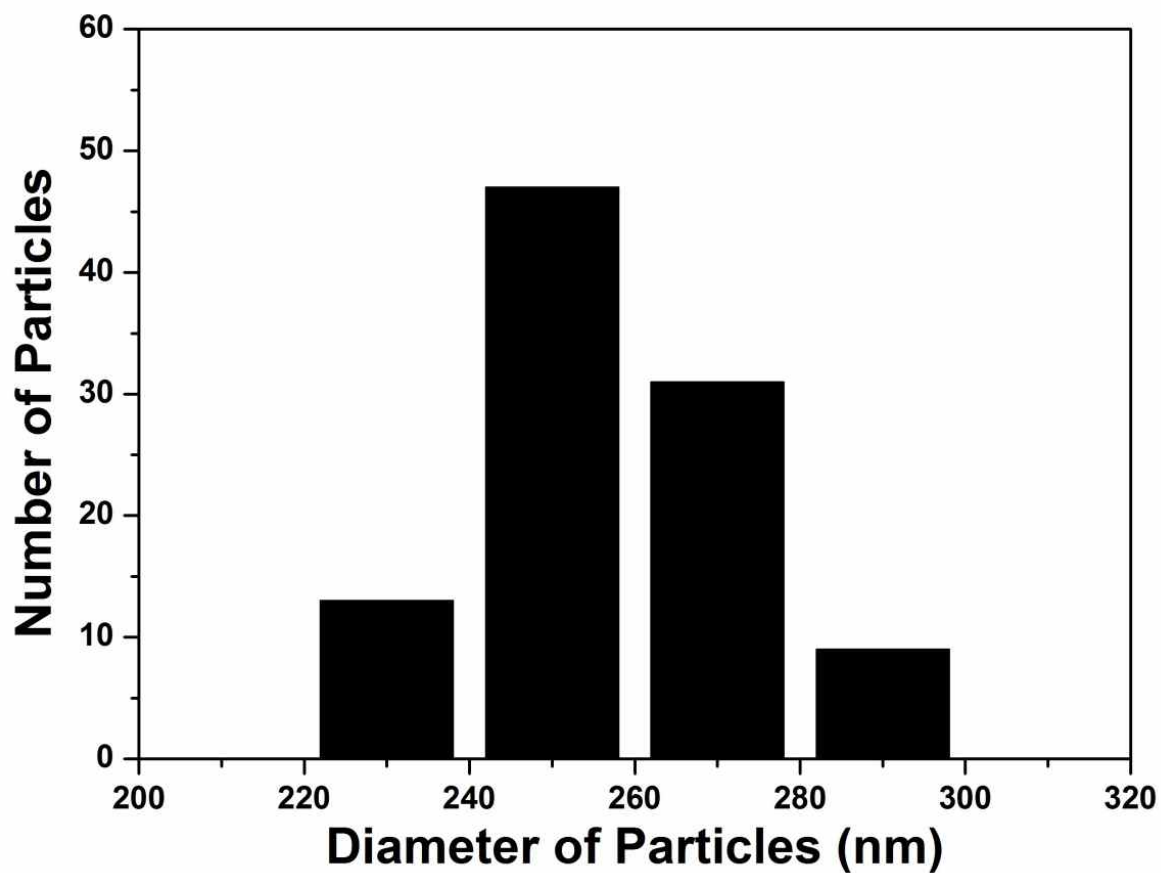

**Figure S11.** Size distribution of the SNS. The average diameter is  $258.12 \pm 15.43$  nm (More than 100 nanoparticles are evaluated).

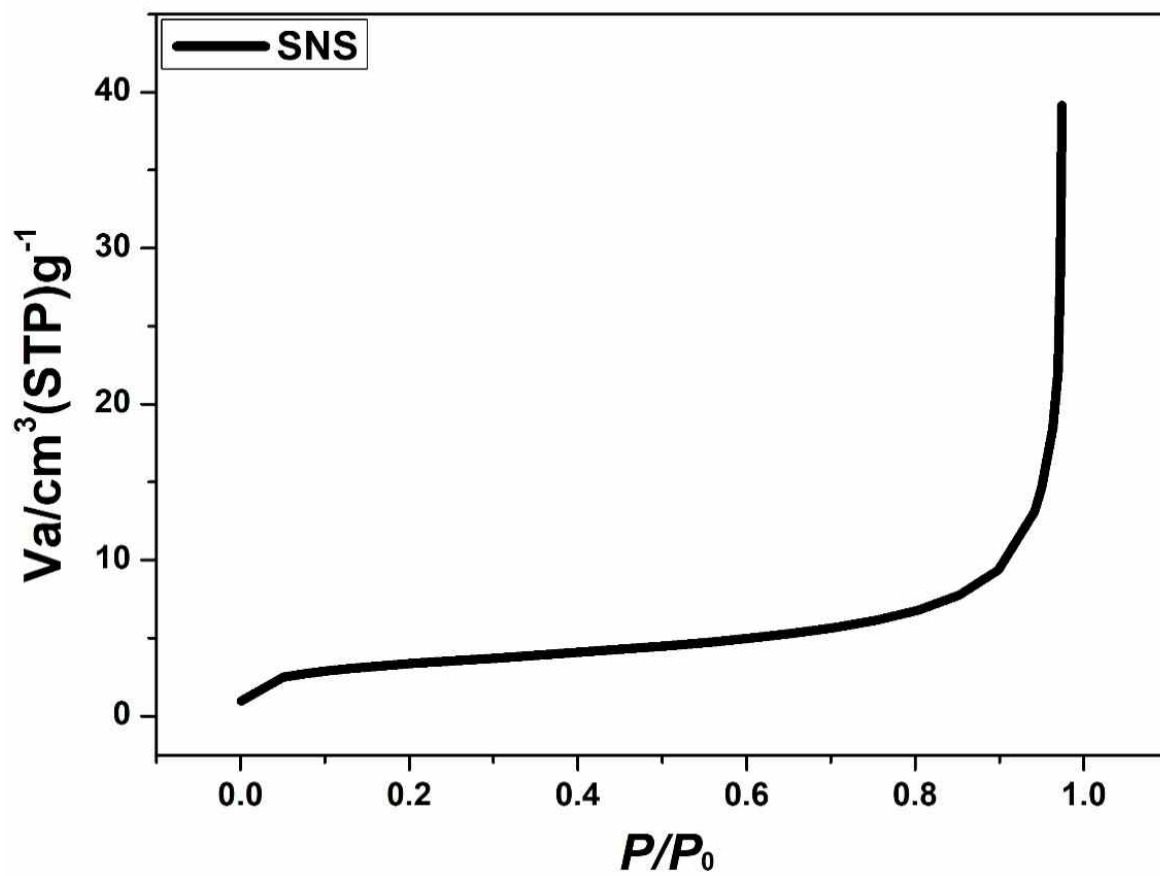

**Figure S12.** Nitrogen adsorption measured at 77 K of the SNS. The specific surface area and pore volume are  $11.55 \text{ m}^2 \text{ g}^{-1}$  and  $0.060 \text{ cm}^3 \text{ g}^{-1}$ , respectively.

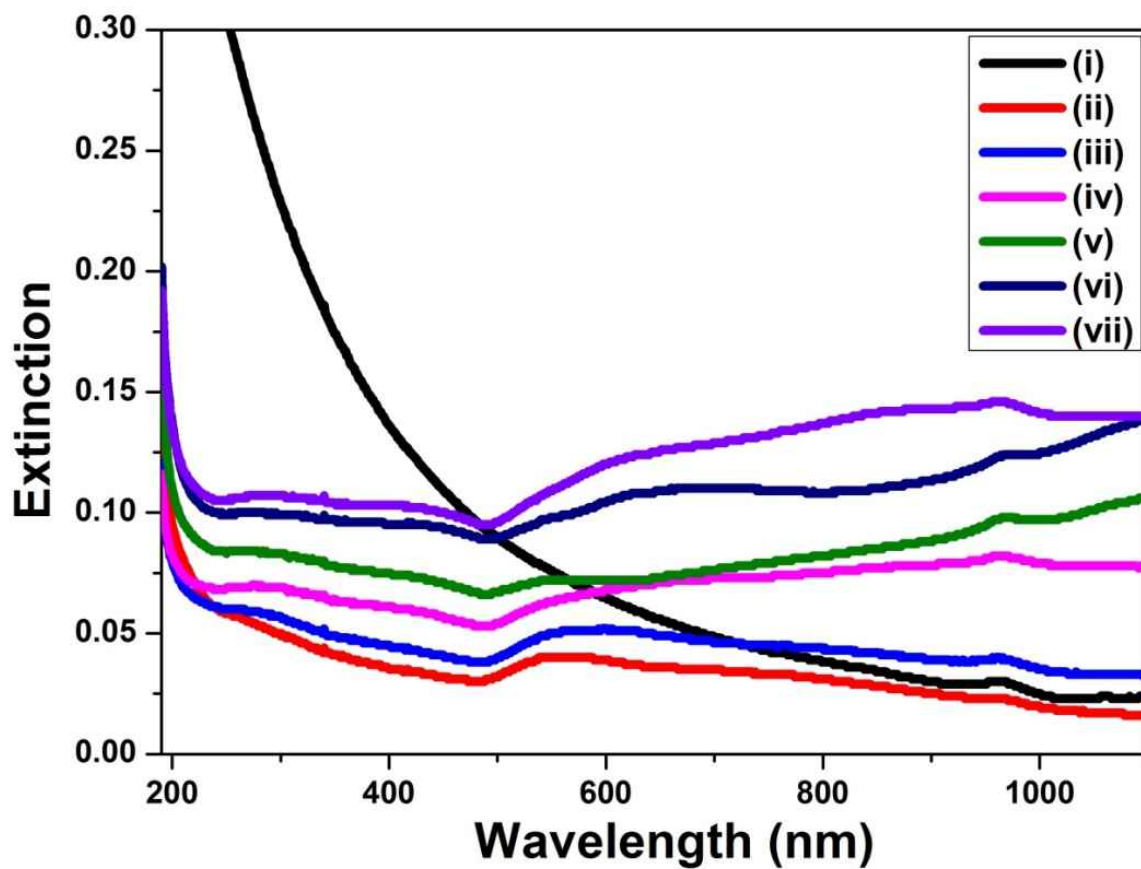

**Figure S13.** UV-vis spectra of aqueous solutions of SNS/Au hybrids synthesized using various  $\text{HAuCl}_4(\text{aq})$  concentrations: (i) SNS/Au dots, (ii~vii) SNS/Au NPs; (ii) 1.25 mM, (iii) 2.5 mM, (iv) 5 mM, (v) 10 mM, (vi) 20 mM and (vii) 30 mM  $\text{HAuCl}_4(\text{aq})$  (The same volume of the second growth solution, 0.8 mL, is used in each case).

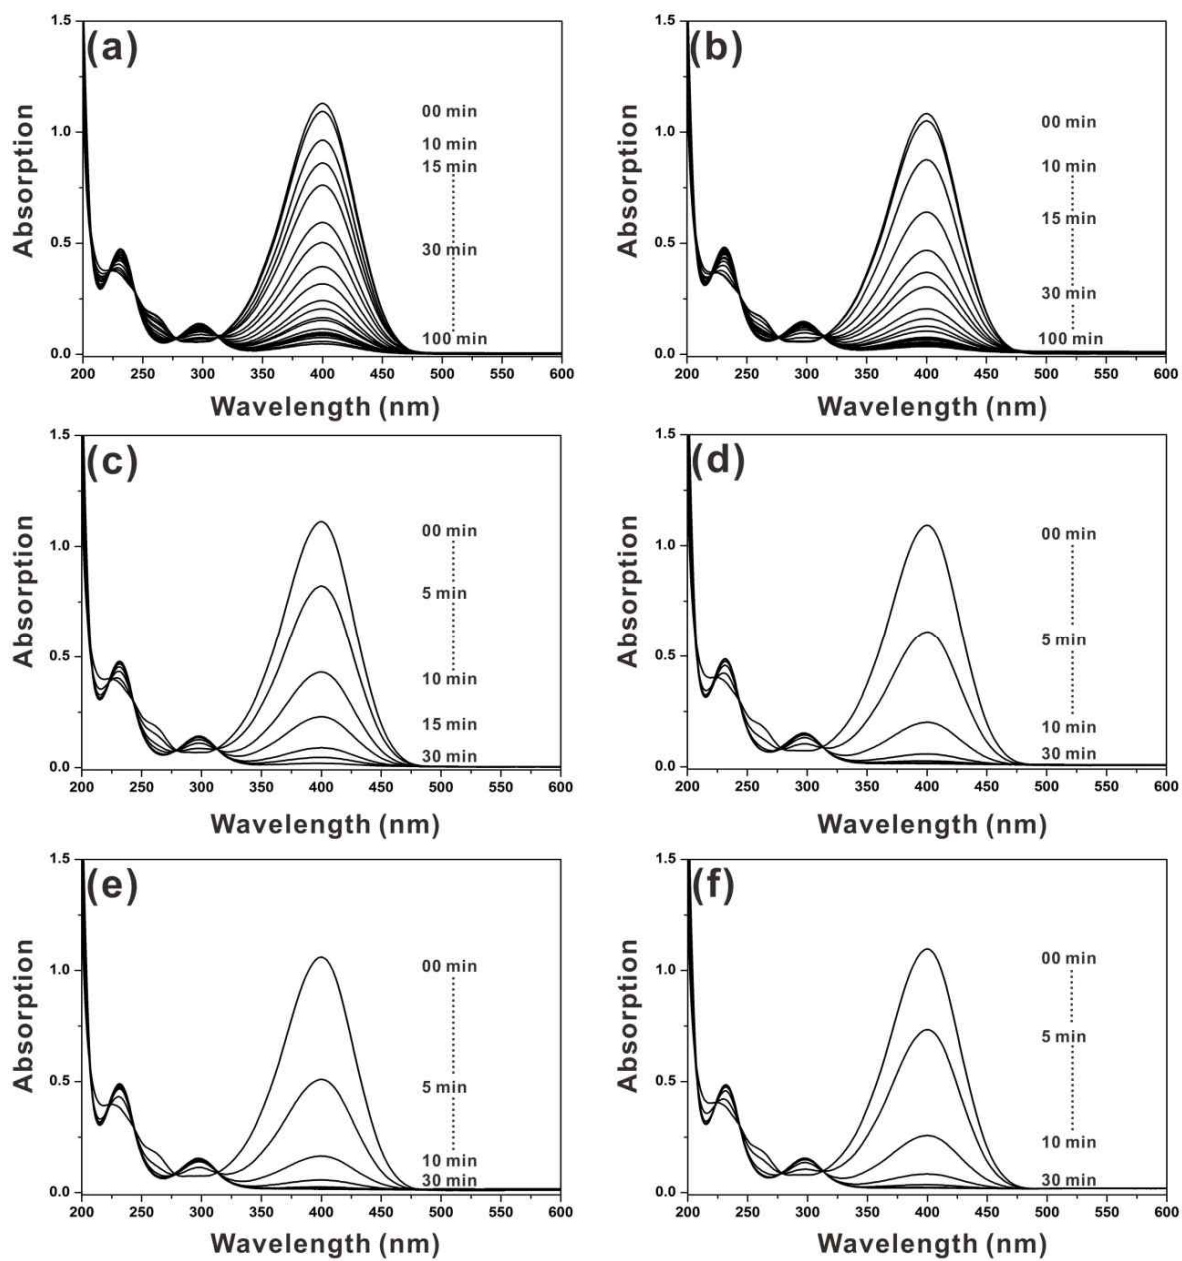

**Figure S14.** Catalytic reduction of 4-NP using DFNS/Au hybrids with various reaction ratios: (a) 7, (b) 15, (c) 30, (d) 61, (e) 123, and (f) 246.

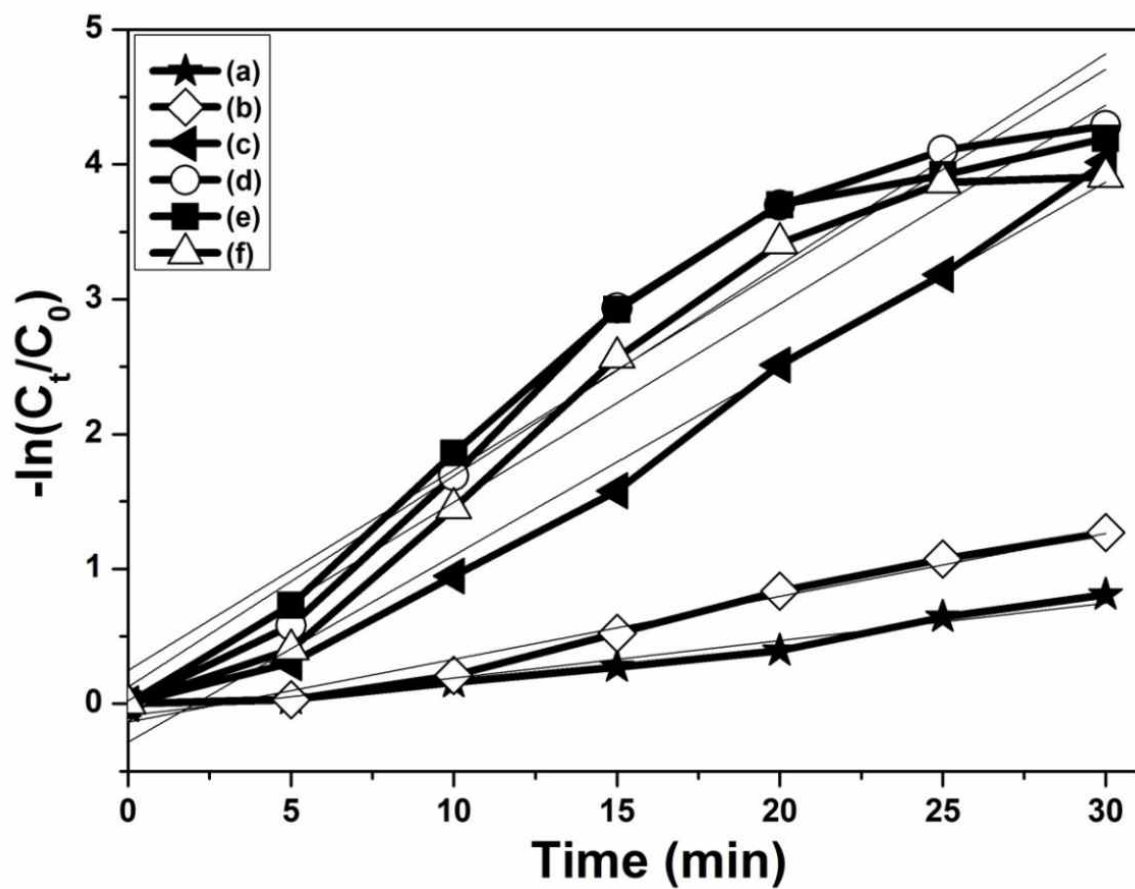

**Figure S15.** Plot of  $-\ln(C_t/C_0)$  versus time for the reduction of 4-NP using catalysts DFNS/Au hybrids with various reaction ratios: (a) 7, (b) 15, (c) 30, (d) 61, (e) 123, and (f) 246.



**Table S1.** Conversion rates of 4-NP reduction reaction using different DFNS/Au hybrids (the conversion of 4-NP is calculated as follows: Conversion (%) =  $(1 - C_t C_0^{-1}) \times 100$ , where  $C_t$  is the absorption of 4-NP at a given reaction time,  $t$ , and  $C_0$  is the initial absorption by 4-NP at  $t = 0$ ).

| Catalyst (Ratio)             | Conversion Rate (30 min, %) |
|------------------------------|-----------------------------|
| DFNS/Au hybrids (ratio: 7)   | 55.49 %                     |
| DFNS/Au hybrids (ratio: 15)  | 71.92 %                     |
| DFNS/Au hybrids (ratio: 30)  | 98.20 %                     |
| DFNS/Au hybrids (ratio: 61)  | 98.63 %                     |
| DFNS/Au hybrids (ratio: 123) | 98.49 %                     |
| DFNS/Au hybrids (ratio: 246) | 98.00 %                     |

**Table S2.** The rate constants of 4-NP reduction reaction using different DFNS/Au hybrids calculated from the slope of the linear fit of  $-\ln(C_t/C_0^{-1})$  versus time.

| Catalyst (Ratio)             | Rate Constant<br>( $10^{-3} \text{ min}^{-1}$ ) |
|------------------------------|-------------------------------------------------|
| DFNS/Au hybrids (ratio: 7)   | 23.8                                            |
| DFNS/Au hybrids (ratio: 15)  | 40.3                                            |
| DFNS/Au hybrids (ratio: 30)  | 125.3                                           |
| DFNS/Au hybrids (ratio: 61)  | 162.3                                           |
| DFNS/Au hybrids (ratio: 123) | 160.0                                           |
| DFNS/Au hybrids (ratio: 246) | 148.3                                           |
